# Supplementary material
Source: publisher site journal article supplement (https://www.dovepress.com/article/598428)
Supplement: Supplementary file 1 [file 598428%20Supplementary%20Material.docx]

**Supplementary Material 1:** Search strategies on databases

| Medline via OvidSP | | |
| --- | --- | --- |
| 17/09/2025 | | |
| #1 | exp stroke/ | 194159 |
| #2 | (stroke* or cerebrovascular accident* or CVA or cerebral vascular event* or CVE or brain infarction or hemorrhagic stroke* or haemorrhagic stroke* or ischemic stroke* or ischaemic stroke* or apoplex*).ti. | 130713 |
| #3 | #1 OR #2 | 217284 |
| #4 | exp depression/ | 173488 |
| #5 | (depression or depressive symptom* or depressive disorder* or depressed mood* or depressive status or dysthymic disorder* or ((emotional or depressive or low or morose or feeling) adj3 (symptom* or illness* or mood or depression or sad*))).ti. or .ab. | 461583 |
| #6 | #4 OR #5 | 492485 |
| #7 | (latent profil* or latent class* or cluster* or mixture model* person-centered or subtyp* or typ* or profil* or course or trajecto*).ti. or .ab. | 5287121 |
| #8 | #3 AND #6 AND #7 | 1208 |
| #9 | limit #8 to (humans and "all adult (19 plus years)") | 824 |
| #10 | limit 9 to (case reports or clinical conference or clinical trial, all or clinical trial, phase i or clinical trial, phase ii or clinical trial, phase iii or clinical trial, phase iv or clinical trial, veterinary or clinical trial protocol or clinical trial or comment or comparative study or congress or consensus development conference or consensus development conference, nih or controlled clinical trial or dataset or dictionary or directory or duplicate publication or editorial or equivalence trial or evaluation study or "expression of concern" or guideline or human challenge trials or interview or lecture or legal case or letter or meta analysis or network meta-analysis or news or newspaper article or observational study, veterinary or patient education handout or portrait or practice guideline or pragmatic clinical trial or randomized controlled trial or randomized controlled trial, veterinary or "review" or "scientific integrity review" or "scoping review" or study guide or "systematic review" or technical report or validation study or video-audio media or webcast) | 248 |
| #11 | #9 NOT #10 | 576 |
| #12 | limit #11 to (chinese or english) | 537 |
| Web of Science Core Collection | | |
| 17/09/2025 | | |
| #1 | stroke* or cerebrovascular accident* or CVA or cerebral vascular event* or CVE or brain infarction or hemorrhagic stroke* or haemorrhagic stroke* or ischemic stroke* or ischaemic stroke* or apoplex* (Title) | 228028 |
| #2 | (emotional or depressive or low or morose or feeling) near/3 (symptom* or illness* or mood or depression or sad*) (Topic) or (depression or depressive symptom* or depressive disorder* or depressed mood* or depressive status or dysthymic disorder*) (Topic) | 921303 |
| #3 | (latent profil* or latent class* or cluster* or mixture model* person-centered or subtyp* or typ* or profil* or course or trajecto*) (Topic) | 13238441 |
| #4 | #1 AND #2 AND #3 | 1336 |
| #10 | Review Article or Proceeding Paper or Meeting Abstract or Book Chapters or Editorial Material or Letter or Note or Retracted Publication (Exclude – Document Types) | 1085 |
| #11 | Limit #10 to English or Chinese | 1043 |
| EMBASE via OvidSP | | |
| 17/09/2025 | | |
| #1 | exp stroke/ | 521340 |
| #2 | (stroke* or cerebrovascular accident* or CVA or cerebral vascular event* or CVE or brain infarction or hemorrhagic stroke* or haemorrhagic stroke* or ischemic stroke* or ischaemic stroke* or apoplex*).ti. | 247880 |
| #3 | #1 OR #2 | 581897 |
| #4 | exp depression/ | 770262 |
| #5 | (depression or depressive symptom* or depressive disorder* or depressed mood* or depressive status or dysthymic disorder* or ((emotional or depressive or low or morose or feeling) adj3 (symptom* or illness* or mood or depression or sad*))).ti. or .ab. | 772746 |
| #6 | #4 OR #5 | 1040801 |
| #7 | (latent profil* or latent class* or cluster* or mixture model* person-centered or subtyp* or typ* or profil* or course or trajecto*).ti. or .ab. | 8473051 |
| #8 | #3 AND #6 AND #7 | 6008 |
| #9 | Limit #8 to (human and (adult <18 to 64 years> or aged <65+ years>)) | 3764 |
| #10 | Limit 9 to (books or chapter or "clinical trial (clinicaltrials.gov)" or conference abstract or conference paper or "conference review" or editorial or erratum or letter or note or "review") | 1490 |
| #11 | #9 NOT #10 | 2274 |
| #12 | Limit #11 to (clinical trial or randomized controlled trial or controlled clinical trial or phase 1 clinical trial or phase 2 clinical trial or phase 3 clinical trial or phase 4 clinical trial) | 232 |
| #13 | 11 NOT 12 | 2042 |
| #14 | Limit #13 to English or Chinese | 1979 |
| #15 | Limit #14 to (meta analysis or "systematic review") | 27 |
| #16 | #14 NOT #15 | 1952 |
| APA PsycInfo via OvidSP | | |
| 17/09/2025 | | |
| #1 | exp stroke/ | 27339 |
| #2 | (stroke* or cerebrovascular accident* or CVA or cerebral vascular event* or CVE or brain infarction or hemorrhagic stroke* or haemorrhagic stroke* or ischemic stroke* or ischaemic stroke* or apoplex*).ti. | 20612 |
| #3 | #1 OR #2 | 29246 |
| #4 | exp "Depression (Emotion)"/ or exp Major Depression/ | 210707 |
| #5 | (depression or depressive symptom* or depressive disorder* or depressed mood* or depressive status or dysthymic disorder* or ((emotional or depressive or low or morose or feeling) adj3 (symptom* or illness* or mood or depression or sad*))).ti. or .ab. | 367021 |
| #6 | #4 OR #5 | 383244 |
| #7 | (latent profil* or latent class* or cluster* or mixture model* person-centered or subtyp* or typ* or profil* or course or trajecto*).ti. or .ab. | 1030743 |
| #8 | #3 AND #6 AND #7 | 544 |
| #9 | Limit #8 to (human and adulthood <18+ years>) | 393 |
| #10 | Limit #9 to English or Chinese | 380 |
| #11 | Limit #10 to (abstract collection or bibliography or chapter or "column/opinion" or "comment/reply" or editorial or "erratum/correction" or interview or letter or poetry or review-book or review-media or review-software & other or reviews) | 10 |
| #12 | #10 NOT #11 | 370 |
| #13 | Limit #12 to ("0100 brain imaging" or "0200 clinical case study" or "0300 clinical trial" or "0700 interview" or "0800 literature review" or "0830 systematic review" or 1200 meta analysis or 1300 metasynthesis or 1600 qualitative study) | 121 |
| #14 | #12 NOT #13 | 249 |
| British Nursing Index | | |
| 17/09/2025 | | |
| #1 | su(Stroke) | 10279 |
| #2 | ti(stroke* or cerebrovascular accident* or CVA or cerebral vascular event* or CVE or brain infarction or hemorrhagic stroke* or haemorrhagic stroke* or ischemic stroke* or ischaemic stroke* or apoplex*) | 10361 |
| #3 | #1 OR #2 | 10313 |
| #4 | su(depression) | 22587 |
| #5 | ti(depression or depressive symptom* or depressive disorder* or depressed mood* or depressive status or dysthymic disorder* or ((emotional or depressive or low or morose or feeling) NEAR/3 (symptom* or illness* or mood or depression or sad*))) OR ab(depression or depressive symptom* or depressive disorder* or depressed mood* or depressive status or dysthymic disorder* or ((emotional or depressive or low or morose or feeling) NEAR/3 (symptom* or illness* or mood or depression or sad*))) | 30107 |
| #6 | #18 OR #19 | 33568 |
| #7 | tiab(latent profil* or latent class* or cluster* or mixture model* person-centered or subtyp* or typ* or profil* or course or trajecto*) | 86776 |
| #8 | #3 AND #6 AND #7 | 70 |
| #25 | NOT (Case Study AND Commentary AND Conference Proceeding AND Corresponsence AND News AND Report) | 65 |
| CINAHL Ultimate via EBSCO | | |
| 17/09/2025 | | |
| #1 | (MH "Stroke+") | 84023 |
| #2 | TI ( stroke* or cerebrovascular accident* or CVA or cerebral vascular event* or CVE or brain infarction or hemorrhagic stroke* or haemorrhagic stroke* or ischemic stroke* or ischaemic stroke* or apoplex* ) | 75856 |
| #3 | #1 OR #2 | 108784 |
| #4 | MH "Depression+" | 151115 |
| #5 | TI ( depression or depressive symptom* or depressive disorder* or depressed mood* or depressive status or dysthymic disorder* or ((emotional or depressive or low or morose or feeling) N3 (symptom* or illness* or mood or depression or sad*)) ) OR AB ( depression or depressive symptom* or depressive disorder* or depressed mood* or depressive status or dysthymic disorder* or ((emotional or depressive or low or morose or feeling) N3 (symptom* or illness* or mood or depression or sad*)) ) | 203299 |
| #6 | #4 OR #5 | 241180 |
| #7 | TI (latent profil* or latent class* or cluster* or mixture model* person-centered or subtyp* or typ* or profil* or course or trajecto*) OR AB (latent profil* or latent class* or cluster* or mixture model* person-centered or subtyp* or typ* or profil* or course or trajecto*) | 950766 |
| #8 | #3 AND #6 AND #7 | 603 |
| #25 | Narrow #8 by Age: all adult, and Language: English, Chinese | 375 |
| Scopus | | |
| 17/09/2025 | | |
| #1 | TITLE-ABS-KEY ( stroke* OR "cerebrovascular accident*" OR cva OR "cerebral vascular event*" OR cve OR "brain infarction" OR "hemorrhagic stroke*" OR "haemorrhagic stroke*" OR "ischemic stroke*" OR "ischaemic stroke*" OR apoplex* ) | 735289 |
| #2 | TITLE-ABS-KEY ( ( emotional OR depressive OR low OR morose OR feeling ) W/3 ( symptom* OR illness* OR mood OR depression OR sad* ) ) OR TITLE-ABS-KEY ( depression OR "depressive symptom*" OR "depressive disorder*" OR "depressed mood*" OR "depressive status" OR "dysthymic disorder*" ) | 1082411 |
| #3 | TITLE-ABS-KEY ( latent profil* or latent class* or cluster* or mixture model* person-centered or subtyp* or typ* or profil* or course or trajecto*) OR AB (latent profil* or latent class* or cluster* or mixture model* person-centered or subtyp* or typ* or profil* or course or trajecto*) | 15712 |
| #4 | #1 AND #2 AND #3 | 54 |
| #9 | EXCLUDE ( DOCTYPE , "review" ) | 52 |
| #10 | LIMIT-TO ( LANGUAGE , "English" ) OR LIMIT-TO ( LANGUAGE , "Chinese" ) | 52 |

Note. * represents any group of characters, including no character; # represents the number of the search strategy in specific database.
